# Supplementary material
Source: ML conference proceedings conference paper supplement (https://openreview.net/forum?id=fKVEMNmWqU)
Supplement: supplementary_material [file attachment]

---

# Reduced Policy Optimization for Continuous Control with Hard Constraints

---

Anonymous Author(s)

Affiliation

Address

email

## Abstract

Recent advances in constrained reinforcement learning (RL) have endowed reinforcement learning with certain safety guarantees. However, deploying existing constrained RL algorithms in continuous control tasks with general hard constraints remains challenging, particularly in those situations with non-convex hard constraints. Inspired by the generalized reduced gradient (GRG) algorithm, a classical constrained optimization technique, we propose a reduced policy optimization (RPO) algorithm that combines RL with GRG to address general hard constraints. RPO partitions actions into basic actions and nonbasic actions following the GRG method and output the basic actions via a policy network. Subsequently, RPO calculates the nonbasic actions by solving equations based on equality constraints using the obtained basic actions. The policy network is then updated by implicitly differentiating nonbasic actions with respect to basic actions. Additionally, we introduce an action projection procedure based on the reduced gradient and apply a modified Lagrangian relaxation technique to ensure inequality constraints are satisfied. To the best of our knowledge, RPO is the first attempt that introduces GRG to RL as a way of efficiently handling both equality and inequality hard constraints. It is worth noting that there is currently a lack of RL environments with complex hard constraints, which motivates us to develop three new benchmarks: two robotics manipulation tasks and a smart grid operation control task. With these benchmarks, RPO achieves better performance than previous constrained RL algorithms in terms of both cumulative reward and constraint violation. We believe RPO, along with the new benchmarks, will open up new opportunities for applying RL to real-world problems with complex constraints.

## 1 Introduction

The past few years have witnessed the significant success of reinforcement learning (RL) [38] in various fields such as mastering GO [36], robotic manipulations [18, 22], autonomous driving [32], and smart grid controlling [48, 43, 31], etc. However, it is still challenging to deploy RL algorithms in real-world control tasks, such as operating robots on a specific surface, controlling power generation to fulfill the demand, etc. The principal reason here is that hard constraints must be taken into account in these control problems. Concretely, such constraints come in the form of both equality and inequality constraints and can be nonlinear or even nonconvex, which makes it difficult to handle them in RL. Moreover, unlike soft constraints, hard constraints take explicit form and require strict compliance, which poses additional challenges.

Existing work on constrained RL can be divided into two categories. The first category involves treating constraints as implicit or soft constraints and using safe RL algorithms [4, 11, 12, 45, 23, 47, 24, 44]. These algorithms approximate the cumulative costs associated with the constraints and optimize the policy network to balance the trade-off between the cumulative rewards and costs.

While Safe RL algorithms have provided certain guarantees on soft constraints, they cannot handle equality constraints since the constraints may not be satisfied due to approximation errors. Moreover, handling multiple constraints using Safe RL algorithms can be computationally expensive, and the existing benchmarks generally only involve simple soft constraints that do not reflect the complexity of real-world applications. In the second category, the approaches treat the output of the policy network as a set of sub-optimal actions, correcting them to satisfy the constraints by adding an extra constrained optimization procedure. This technique has been explored in several works, such as [14, 27, 8, 31, 30, 22]. Compared to Safe RL algorithms, these algorithms can guarantee the satisfaction of hard constraints but are mostly designed for specific applications and hard constraints of a particular form. For instance, OptLayer [27] employs OptNet [7] into RL to ensure the satisfaction of linear constraints in robotic manipulation. As a result, these approaches to RL with hard constraints are limited in their ability to generalize and lack a generalized formulation.

To address the limitations of existing RL algorithms in handling hard constraints, we propose a constrained off-policy reinforcement learning algorithm called Reduced Policy Optimization (RPO). Our approach is inspired by Generalized Reduced Gradient (GRG), a classical optimization method. RPO partitions actions into basic actions and nonbasic actions following the GRG method and uses a policy network to output the basic actions. The nonbasic actions are then calculated by solving equations based on equality constraints using the obtained basic actions. Lastly, the policy network is updated by the reduced gradient with respect to basic actions, ensuring the satisfaction of the equality constraints. Moreover, we also incorporate a modified Lagrangian relaxation method with an exact penalty term into the loss function of the policy network to improve the initial actions. Our approach provides more confidence when deploying off-policy RL algorithms in real-world applications, as it ensures that the algorithms behave in a feasible and predictable manner. It is worth noting that there is currently a lack of RL environments with complex hard constraints. This motivates us to develop three new benchmarks to validate the performance of our proposed method. To summarize, our main contributions are as follows:

1) **Reduced Policy Optimization.** We present RPO, an innovative approach that introduces the GRG algorithm into off-policy RL algorithms. RPO treats the output of the policy network as a good initial solution and enforces the satisfaction of equality and inequality constraints via solving corresponding equations and applying reduced gradient projections respectively. To the best of our knowledge, this is the first attempt to fuse RL algorithms with the GRG method, providing a novel and effective solution to address the limitations of existing RL algorithms in handling hard constraints.

2) **RL Benchmarks with Hard Constraints.** We develop three benchmarks with hard constraints to validate the performance of our method, involving Safe CartPole, Spring Pendulum and Optimal Power Flow (OPF) with Battery Energy Storage. Comprehensive experiments on these benchmarks demonstrate the superiority of RPO in terms of both cumulative reward and constraint violation. We believe that these benchmarks will be valuable resources for the research community to evaluate and compare the performance of RL algorithm in environments with complex hard constraints.

## 2 Related Works

In this section, we first review the existing methods in the field of constrained RL and divide them into different types according to different constraints. We summarize the differences between our method and previous works in Table 1. Besides, we also introduce the literature on the GRG method as the motivation and background of our method.

| Constraint                     | Method                           | Multiple | Inequality | Equality | Generality             | Model Agnostic |
|--------------------------------|----------------------------------|----------|------------|----------|------------------------|----------------|
| Soft, Cumulative               | CPO [4], RCPO [39], PCPO [45]    | ✗        | ✓          | ✗        | ✓                      | ✓              |
| Soft, Cumulative               | Lyapunov [12, 13]                | ✗        | ✓          | ✗        | ✓                      | ✓              |
| Soft, Cumulative               | FOCOPS [47], CUP [44]            | ✗        | ✓          | ✗        | ✓                      | ✓              |
| Soft, Cumulative               | IPO [23], P3O [33]               | ✓        | ✓          | ✗        | ✓                      | ✓              |
| Soft, Cumulative/Instantaneous | Lagrangian [11, 9, 37], FAC [26] | ✗        | ✓          | ✗        | ✓                      | ✓              |
| Soft, Instantaneous            | Safety Layer [14]                | ✓        | ✓          | ✗        | ✗ (Linear)             | ✓              |
| Soft, Instantaneous            | Recovery RL [40]                 | ✗        | ✓          | ✗        | ✓                      | ✓              |
| Hard, Instantaneous            | OptLayer [27], ReCO-RL [8]       | ✓        | ✓          | ✓        | ✗ (Specific Linear)    | ✓              |
| Hard, Instantaneous            | ATACOM [22]                      | ✓        | ✓          | ✓        | ✗ (Specific Nonconvex) | ✗ (Robotics)   |
| Hard, Instantaneous            | CC-SAC [31], Hybrid-DDPG [43]    | ✓        | ✓          | ✓        | ✗ (Specific Nonconvex) | ✗ (Power Grid) |
| Hard, Instantaneous            | RPO(*)                           | ✓        | ✓          | ✓        | ✓                      | ✓              |

Table 1: Comparison among constrained RL algorithms of different categories

81 **Soft-Constrained RL.** RL with soft constraints is well-studied and also known as safe reinforcement  
 82 learning (Safe RL). One of the principal branches in Safe RL methods is based on the Lagrangian  
 83 relaxation such as [11, 37, 20], where the primal-dual update is used to enforce the satisfaction  
 84 of constraints. Besides, different penalty terms [23, 33, 39] are designed to maintain the tradeoff  
 85 between the optimality in reward and safety guarantees. Moreover, Notable classical methods of  
 86 safe reinforcement learning include CPO [4] based on the local policy search; Lyapunov-based  
 87 approaches [12]; PCPO [45], FOCOPS [47], and CUP [24] based on two-step optimization. Besides,  
 88 RL with soft instantaneous constraints was first studied separately in [14]. This approach adds

89 a safety layer to the policy with a pre-trained constraint-violation classifier but can only handle  
 90 linear constraints. Other approaches include [40] based on the Recovery and [42, 41] based on  
 91 the Gaussian Process. Very recently, Unrolling Safety Layer [46] was proposed to handle the soft  
 92 instantaneous constraints in RL. However, these approaches in soft-constrained RL tackle constraints  
 93 implicitly and cannot ensure strict compliance with the constraints, especially the equality ones. By  
 94 contrast, our method can handle both hard equality and inequality constraints effectively under the  
 95 RL framework.

96 **Hard-Constrained RL.** Compared to RL with soft constraints, RL with hard constraints is rarely  
 97 studied, and most schemes are designed for some specific application. Pham et al. [27] proposed  
 98 a plug-in architecture called OptLayer based on OptNet [7] to avoid infeasible actions in robotics  
 99 manipulation. In studying resource allocation problems, Bhatia et al. [8] developed further Optlayer  
 100 techniques to deal with hierarchical linear constraints. Liu et al. [22] investigated robotics manipula-  
 101 tion tasks based on RL and uses manifold optimization to handle the hard constraints with the inverse  
 102 dynamic model of robots. Other researchers such as [43, 31] incorporated special optimization  
 103 techniques into RL to handle power operation tasks in smart grids. However, these methods are  
 104 designed solely for specific applications or constraints of special types. For example, OptLayer can  
 105 only handle linear constraints in robotics manipulation. By contrast, RPO is not designed for one  
 106 specific application and can handle general hard constraints in decision-making problems.

107 **Generalized Reduced Gradient Method.** GRG [3] is a classical constrained optimization technique  
 108 and has the powerful capability to handle optimization with nonlinear hard constraints [25]. The  
 109 basic idea of GRG is closely related to the simplex method in linear programming which divides  
 110 variables into basic and nonbasic groups and then utilizes the reduced gradient to perform the update  
 111 on the basic variables and nonbasic variables respectively. In the past decades, the GRG method  
 112 is applied to stock exchange [5], optimal control in very-large-scale robotic systems [29], optimal  
 113 power flow models [15], and many other fields. Additionally, more recently, several works such as  
 114 [35] also fuse the genetic algorithms with the GRG method. Besides, recent research like DC3 [16] in  
 115 deep learning is also based on the idea of the GRG method. DC3 was proposed for learning to solve  
 116 constrained optimization problems and has demonstrated its good capability to obtain near-optimal  
 117 decisions with the satisfaction of nonlinear constraints.

### 118 3 Preliminaries

119 **Markov Decision Process.** A classical Markov decision process (MDP) [38] can be represented as a  
 120 tuple  $(S, A, R, P, \mu)$ , where  $S$  is the state space,  $A$  is the action space,  $R : S \times A \times S \rightarrow \mathbb{R}$  is the  
 121 reward function,  $P : S \times A \times S \rightarrow [0, 1]$  is the transition probability function (where  $P(s' | s, a)$   
 122 is the transition probability from the previous state  $s$  to the state  $s'$  when the agent took action  $a$   
 123 in  $s$ ), and  $\mu : S \rightarrow [0, 1]$  is the distribution of the initial state. A stationary policy  $\pi : S \rightarrow \mathcal{P}(A)$   
 124 is a map from states to probability distributions over actions, and  $\pi(a|s)$  denotes the probability of  
 125 taking action  $a$  in state  $s$ . The set of all stationary policies  $\pi$  is denoted by  $\Pi$ . The goal of RL is  
 126 to find an optimal  $\pi^*$  that maximizes the expectation of the discounted cumulative reward, which  
 127 is  $J_R(\pi) = \mathbb{E}_{\tau \sim \pi} [\sum_{t=0}^{\infty} \gamma^t R(s_t, a_t, s_{t+1})]$ . Here  $\tau = (s_0, a_0, s_1, a_1 \dots)$  denotes a trajectory, and  
 128  $\tau \sim \pi$  is the distribution of trajectories when the policy  $\pi$  is employed. Then, The value function of  
 129 state  $s$  is  $V_R^\pi(s) = \mathbb{E}_{\tau \sim \pi} [\sum_{t=0}^{\infty} \gamma^t R(s_t, a_t, s_{t+1}) | s_0 = s]$ , the action-value function of state  $s$  and  
 130 action  $a$  is  $Q_R^\pi(s, a) = \mathbb{E}_{\tau \sim \pi} [\sum_{t=0}^{\infty} \gamma^t R(s_t, a_t, s_{t+1}) | s_0 = s, a_0 = a]$ .

131 **Generalized Reduced Gradient Method.** GRG considers the following nonlinear optimization  
 132 problem:

$$\min_{\mathbf{x} \in \mathbb{R}^n} f(\mathbf{x}), \text{ s.t. } \mathbf{h}(\mathbf{x}) = \mathbf{0} \in \mathbb{R}^m, \mathbf{a} \leq \mathbf{x} \leq \mathbf{b} \quad (1)$$

133 The optimization problem (1) is a general formulation of nonlinear optimization since any nonlinear  
 134 inequality constraints can always be transformed into equality constraints with inequality box con-  
 135 straints by adding slack variables. GRG first partitions the variable  $\mathbf{x}$  into the basic variable  $\mathbf{x}^B$  and  
 136 nonbasic variable  $\mathbf{x}^N$ . Then the reduced gradient with respect to  $\mathbf{x}^B$  is derived as follows [25]:

$$\mathbf{r}^T = \nabla_{\mathbf{x}^B} f(\mathbf{x}^N, \mathbf{x}^B) - \nabla_{\mathbf{x}^N} f(\mathbf{x}^N, \mathbf{x}^B) [\nabla_{\mathbf{x}^N} \mathbf{h}(\mathbf{x}^N, \mathbf{x}^B)]^{-1} \nabla_{\mathbf{x}^B} \mathbf{h}(\mathbf{x}^N, \mathbf{x}^B), \quad (2)$$

137 Finally, GRG defines the update step as  $\Delta \mathbf{x}^B = -\mathbf{r}$  and  $\Delta \mathbf{x}^N = -[\nabla_{\mathbf{x}^N} \mathbf{h}]^{-1} \nabla_{\mathbf{x}^B} \mathbf{h} \Delta \mathbf{x}^B$  to ensure  
 138 the equality constraints still hold during the iterations. More details of the GRG method can be  
 139 referred to in supplementary materials.

## 140 4 Reduced Policy Optimization

141 Although simple explicit constraints in neural networks can be easily handled by some specific  
 142 activation functions (e.g., the Softmax operator for probability Simplex constraints and the ReLU  
 143 operators for positive orthant constraints), it is hard to make the output of the policy network satisfy  
 144 general hard constraints, especially for nonlinear and nonconvex constraints. In this section, we  
 145 propose RPO to handle MDP with hard constraints formulated as follows:

$$\begin{aligned} \max_{\theta} \quad & J_R(\pi_{\theta}) \\ \text{subject to} \quad & f_i(\pi_{\theta}(s_t); s_t) = 0 \quad \forall i, t, \\ & g_j(\pi_{\theta}(s_t); s_t) \leq 0 \quad \forall j, t, \end{aligned} \quad (3)$$

146 where  $f_i$  and  $g_j$  are the hard constraints that are related to  $s_t$  and  $a_t$  in the current step, and they are  
 147 required to be satisfied in all states for the policy. Notably, while this formulation is actually a special  
 148 case of CMDP [6], it focuses more on the hard instantaneous constraints in constrained RL and is  
 149 different from the cases considered by previous works in safe RL, where the constraints only involve  
 150 implicit inequality ones.

151 RPO consists of a policy network combined with an equation solver to predict the initial actions and  
 152 a post-plugged GRG update procedure to generate feasible actions under a differentiable framework  
 153 from end to end. In specific, the decision process of RPO can be decomposed into a construction  
 154 stage and a projection stage to deal with equality and inequality constraints respectively. In addition,  
 155 we also developed practical implementation tricks combined with a modified Lagrangian relaxation  
 156 method in order to further enforce the satisfaction of hard constraints and fuse the GRG method into  
 157 RL algorithms appropriately. The pipeline of RPO is shown in Figure 1.

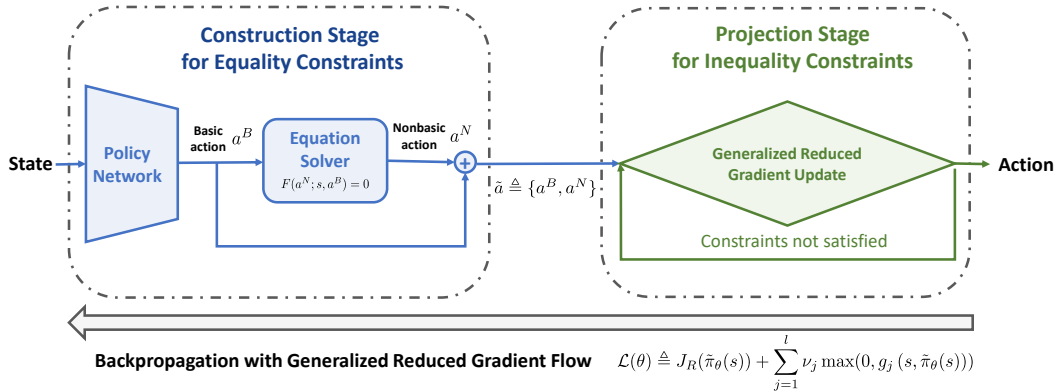

Figure 1: The training and decision procedure of RPO.

### 158 4.1 Construction Stage to Handle Equality Constraints

159 Recalling the nature of equality constraints, it can be viewed as the reduction of the freedom degree  
 160 in actions. Hence, we follow the formulation in GRG method and divide actions  $a \in \mathbb{R}^n$  into basic  
 161 actions  $a^B \in \mathbb{R}^m$  and nonbasic actions  $a^N \in \mathbb{R}^m$ , where  $n - m$  is defined as the number of equality  
 162 constraints. Hence, the actual actions that we need to determine are the basic actions. Given that, we

utilize the policy network to output this part of actions and then calculate the nonbasic actions, via solving a set of equations defined by equality constraints and the predicted basic actions, to guarantee the satisfaction of equality constraints. Additionally, we also present a correct gradient flow based on GRG method, which makes it possible to train the policy network in an end-to-end way. As shown in Proposition 1, we illustrate how to backpropagate from the nonbasic actions  $a^N$  to the basic actions  $a^B$ .

**Proposition 1. (Gradient Flow in Construction Stage)** Assume that we have  $(n - m)$  equality constraints denoted as  $F(a; s) = \mathbf{0}$  in each state  $s$ . Let  $a^B \in \mathbb{R}^m$  and  $a \in \mathbb{R}^n$  be the basic actions and integrated actions, respectively. Let  $a^N = \phi_N(a^B) \in \mathbb{R}^{n-m}$  denote the nonbasic actions where  $\phi_N$  is the implicit function that determined by the  $n - m$  equality constraints. Then, we have

$$\frac{\partial \phi_N(a^B)}{\partial a^B} = - (J_{:,m+1:n}^F)^{-1} J_{:,1:m}^F \quad (4)$$

where  $J^F = \frac{\partial F(a;s)}{\partial a} \in \mathbb{R}^{(m-n) \times n}$ ,  $J_{:,1:m}^F$  is the first  $m$  columns of  $J^F$  and  $J_{:,m+1:n}^F$  is the last  $(n - m)$  columns of  $J^F$ .

The proof is provided in supplementary materials. Additionally, we denote the decision process of the construction stage, including the policy network  $\mu_\theta$  and the equation solving procedure  $\phi_N$  as  $\tilde{\pi}_\theta$ , and initial actions  $\tilde{a}$  as the concatenation of  $a^B$  and  $a^N$ , i.e.,  $\tilde{a} = (a^B, a^N)$ .

## 4.2 Projection Stage to Handle Inequality Constraints

After the construction stage, the initial actions denoted as  $\tilde{a}$  may still fall out of a feasible region determined by inequality constraints. Hence, the principal difficulty here is to project the action into the feasible region without violating the equality constraints that have been done in the construction stage. To address this issue, the proposed projection stage is to correct the action in the null space defined by equality constraints. Specifically, this projection is an iterative procedure similar to GRG method, which regards the summation of violation in inequality constraints as the objective  $\mathcal{G}(a^B, a^N) \triangleq \sum_j \max\{0, g_j(a; s)\}$ . Since the update may destroy the satisfaction of equality constraints, we also need to consider equality constraints in the optimization problem. Then, we can employ GRG updates to the action until all the inequality constraints are satisfied, which means we find the optimal solution to this optimization problem illustrated above. Here the GRG update is defined as

$$\begin{aligned} \nabla_{a^B} \mathcal{G}(a^B, a^N) &\triangleq \frac{\partial \mathcal{G}(a^B, a^N)}{\partial a^B} + \frac{\partial \phi_N(a^B)}{\partial a^B} \frac{\partial \mathcal{G}(a^B, a^N)}{\partial a^N} \\ \Delta a^B &= \nabla_{a^B} \mathcal{G}(a^B, a^N), \quad \Delta a^N = \frac{\partial \phi_N(a^B)}{\partial a^B} \Delta a^B. \end{aligned} \quad (5)$$

Then, the GRG updates are conducted as follows,

$$a_{k+1}^B = a_k^B - \eta_a \Delta a^B, \quad a_{k+1}^N = a_k^N - \eta_a \Delta a^N. \quad (6)$$

where  $\eta_a$  called projection step can be viewed as the learning rate of GRG update to control the step of update and  $a_k$  denotes the actions  $a$  at the  $k$ -th update where  $a_0 \triangleq \tilde{a}$ . After the projection stage, we obtain the feasible actions that can be deployed in the environment and denote the whole process of the construction stage and projection stage as  $\pi_\theta$ , which represents the complete policy performed.

**Theorem 1. (GRG update in Tangent Space)** If  $\Delta a^N = \frac{\partial \phi_N(a^B)}{\partial a^B} \Delta a^B$ , the GRG update for inequality constraints is in the tangent space of the manifold determined by linear equality constraints.

The proof is referred to in supplementary materials. Theorem 1 indicates that the projection stage will not violate the linear equality constraints. With regard to nonlinear equality constraints, we can approximate this nonlinear equality manifold with the tangent space at each GRG update. In that case, we need to set the projection step  $\eta_a$  with a sufficiently small value, practically, smaller than  $10^{-3}$ , to avoid destroying the satisfaction of equality constraints. In this way, we can ensure that the GRG update is conducted in the manifold defined by the nonlinear equality constraints. Additionally, a similar projection method was proposed in [16] with  $\ell_2$  norm objective, which is likely to fail in the nonlinear situation as we analyze in the supplementary materials.

### 4.3 Practical Implementation

Here we present details about the implementation of our RPO model and some training designs. They mainly include two aspects: 1) how to achieve better initial actions from the policy network and 2) how to incorporate such a decision process into the training of off-policy RL algorithms.

---

#### Algorithm 1 Training Procedure of RPO

---

**Input:** Policy network  $\mu_\theta(s)$ , value network  $Q_\omega(s, a)$ , penalty factors  $\nu$ , replay buffer  $\mathcal{D}$ .

```

1: for  $t$  in  $1, 2, \dots, T$  do
2:   Sample the basic actions  $a_t^B$  with the output of  $\mu_\theta(s_t)$  and some random process.
3:   Calculate the action  $a_t$  according to the construction stage 4.1 and projection stage 4.2.
4:   Take the action  $a_t$  in the environment and store the returned transition in  $\mathcal{D}$ .
5:   Sample a mini-batch of transitions in  $\mathcal{D}$ .
6:   Update the parameters of the policy network using 8 and the penalty factors using 9.
7:   Construct TD target as  $y_t = r_t + \gamma Q_\omega(s_{t+1}, \pi_\theta(s_{t+1}))$ .
8:   Update the parameters of the value network using MSE loss.
9: end for

```

---

**Policy Loss with Modified Lagrangian Relaxation.** While the above two-stage decision procedure can cope with the satisfaction of equality and inequality constraints, the policy network is also required to guarantee certain feasibility of inequality constraints for better initial actions  $\tilde{a}$ . Otherwise, we may need hundreds of GRG updates in the projection stage to satisfy all the inequality constraints. Here, we use an augment loss with Lagrangian relaxation for the policy network to obtain initial actions for the inequality projection stage. Common approaches such as [46] use fixed Lagrangian multipliers in their loss function. However, such fixed Lagrangian multipliers are not easy to obtain and may require extra information and computation to tune. In this paper, we perform a dual update on Lagrangian multipliers to adaptively tune them during the training period. As illustrated in Section 3, after the equality construction stage the constrained MDP problem is formulated as

$$\begin{aligned} \max_{\pi} \quad & J_R(\tilde{\pi}_\theta) \\ \text{subject to} \quad & g_j(\tilde{\pi}_\theta(s_t); s_t) \leq 0, \forall j, t. \end{aligned} \quad (7)$$

This means we need to deal with instantaneous inequality constraints in all states. Hence, we cannot apply the primal-dual update method directly like PDO [11]. Otherwise, we need to compute the dual variables on all states, which is obviously unrealistic. Fortunately, we can maintain only one Lagrangian multiplier  $\nu^j$  for each inequality constraint in all states with the exact penalty term  $\max\{0, g_j(\tilde{\pi}(s_t); s_t)\}$  [25]. Accordingly, the new objective with the exact penalty term is

$$\min_{\theta} \tilde{\mathcal{L}}(\theta) \triangleq -J_R(\tilde{\pi}_\theta) + \mathbb{E}_{s \sim \pi} \left[ \sum_j \nu^j \max\{0, g_j(\tilde{\pi}(s_t); s_t)\} \right] \quad (8)$$

The following theorem establishes the equivalence between the unconstrained problem (8) and the constrained problem (7).

**Theorem 2. (Exact Penalty Theorem)** Assume  $\nu_s^j$  is the Lagrangian multiplier vector corresponding to  $j$ th constraints in state  $s$ . If the penalty factor  $\nu^j \geq \|\nu_s^j\|_\infty$ , the unconstrained problem (8) is equivalent to the constrained problem (7).

The proof is referred to in the supplementary materials. According to the

$$\nu_{k+1}^j = \nu_k^j + \eta_\nu^j \mathbb{E}_{s \sim \pi} [\max\{0, g_j(\tilde{\pi}(s_t); s_t)\}] \quad (9)$$

where  $\eta_\nu^j$  is the learning rate of  $j$ -th penalty factors,  $\nu_k^j$  is value of  $\nu^j$  in the  $k$ -th step and  $\nu_0^j = 0$ . Since the exact penalty term,  $\mathbb{E}_{s \sim \pi} [\max\{0, g_j(\tilde{\pi}(s_t); s_t)\}]$ , is always non-negative, the penalty factors are monotonically increasing during the training procedure. Hence, we can always obtain sufficiently large  $\nu^j$  that satisfies the condition in Theorem 2, i.e.,  $\nu^j \geq \|\nu_s^j\|_\infty$ . Besides, we also find that the adaptive penalty term does not prevent the exploration for higher rewards of the RL agent at the beginning of the training procedure in Section 5.

**Off-policy RL Training.** Since we augment the policy loss function with the exact penalty term, the actual objective of our algorithm is two-fold. One is to obtain the optimal policy with the satisfaction

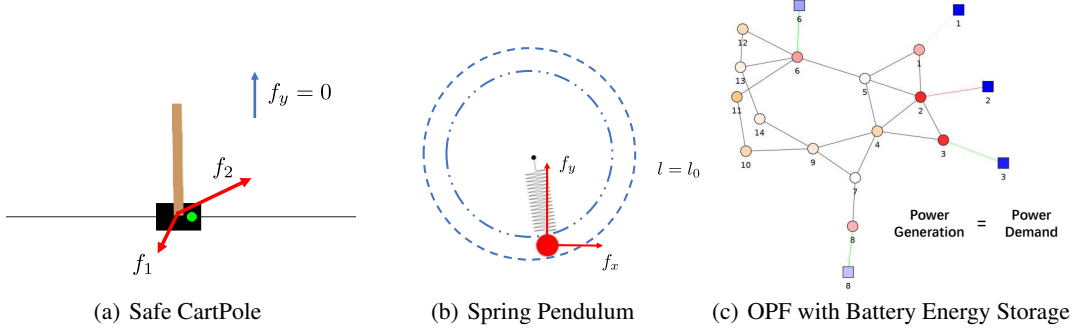

Figure 2: Visualization of RL benchmarks with hard constraints. (a) **Safe CartPole**. The indicator lamp in the cart will be green if the given actions are feasible, and will be red otherwise. (b) **Spring Pendulum**. The length of the spring will be changed if the equality constraint is violated. (c) **OPF with Battery Energy Storage**. The circle nodes represent the buses in the electricity grid, and the square nodes represent the batteries connected to the generator buses. We use light and shade to reflect the state of batteries and the power generation and demand of buses. In addition, the edge between the generator bus and the battery will be red if the battery is charging, and green if the battery is discharging.

of hard constraints. Another is to reduce the number of GRG updates performed during the projection stage. This indicates there exists a gap between the behavioral policy and the target policy in RPO, which results from the changing times of GRG updates performed in the projection stage.

Hence, RPO should be trained like off-policy RL methods as Algorithm 1. Specifically, we regard the initial actions  $\tilde{a}$  output by the construction stage as the optimization object rather than the actions  $a$  post-processed by the projection stage. Otherwise, the training process will be unstable and even collapse due to the changing times of GRG updates in the projection stage, which can also be viewed as a changing network architecture. Besides, we use the  $y_t = r_t + \gamma Q_\omega(s_{t+1}, \pi_\theta(s_{t+1}))$  to construct the TD target since  $\pi_\theta$  is the actual policy we deploy in the environment.

## 5 Experiments

To validate our method and further facilitate research for MDP with hard constraints, we develop three benchmarks with visualization according to the dynamics in the real world, ranging from classical robotic control to smart grid operation. They involve Safe CartPole, Spring Pendulum, and Optimal Power Flow with Battery Energy Storage. Then, we incorporate RPO into two classical off-policy RL algorithms, DDPG [21] and SAC [19], which we call RPO-DDPG and RPO-SAC respectively.

RPO is compared with three representative Safe RL algorithms, including CPO [4], CUP [44], and Safety Layer [14]. Notably, we transform the hard equality constraints into two inequality constraints since existing Safe RL methods cannot handle both general equality and inequality constraints. Furthermore, we also contrast the RPO-DDPG and RPO-SAC with DDPG-L and SAC-L, where DDPG-L and SAC-L represent DDPG and SAC only modified with the Lagrangian relaxation method we mentioned in Section 4.3 and without the two-stage decision process in RPO respectively. Besides, DDPG-L and SAC-L deal with the equality constraints as we mentioned in Safe RL algorithms. More details related to the concrete RPO-DDPG and RPO-SAC algorithms are illustrated in the supplementary materials.

### 5.1 RL Benchmarks with Hard Constraints

Specifically, our benchmarks are designed based on [10], with extra interfaces to return the information of the hard constraints. To the best of our knowledge, it is the first evaluation platform in RL that considers both equality constraints and inequality constraints. Figure 2 shows the visualization of these three benchmarks, and the simple descriptions for them are presented in the contexts below. More details about them are provided in the supplementary materials.

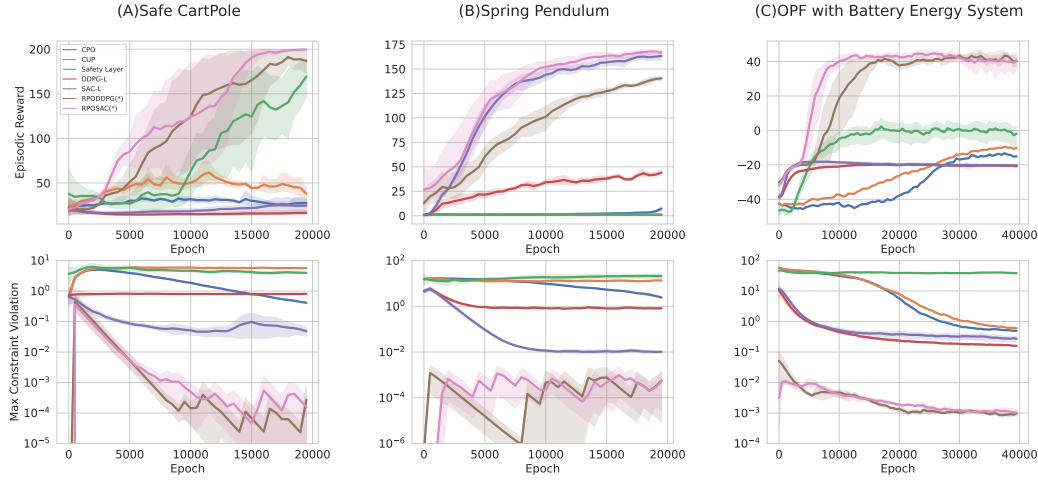

Figure 3: Learning Curves of different algorithms on our three benchmarks across 5 runs. The x-axis is the number of training epochs. The y-axis is the episodic reward (the first line), and max instantaneous constraint violation (the second line) respectively.

**1) Safe CartPole.** Different from that standard CartPole environment in Gym [10], we control two forces from different directions in the Safe CartPole environment. The goal is to keep the pole upright as long as possible while the summation of the two forces should be zero in the vertical direction and be bounded by a box constraint in the horizontal direction. That is, the former is the hard equality constraint, while the latter is the hard inequality constraint.

**2) Spring Pendulum.** Motivated by the Pendulum environment [10], we construct a Spring Pendulum environment that replaces the pendulum with a light spring, which connects the fixed point and the ball. In order to keep the spring pendulum in the upright position, two torques are required to apply in both vertical and horizontal directions. Meanwhile, the spring should be maintained at a fixed length, which introduces a hard equality constraint. Unlike that in Safe CartPole, here equality constraint is state-dependent since the position of the spring is changed during the dynamical process. Besides, the summation of the two torques is also bounded by introducing a quadratic inequality constraint.

**3) Optimal Power Flow with Battery Energy Storage.** Optimal Power Flow (OPF) is a classical problem in smart grid operation to minimize the total cost of power generation with the satisfaction of grid demand. However, battery energy storage systems or electric vehicles have been integrated into smart grids to alleviate the fluctuations of renewable energy generation recently. As illustrated in [28, 34], we need to jointly optimize the charging or discharging of batteries with OPF for the long-term effect of the smart grid operation. According to this real-world application, we design this environment, which is possessed of nonlinear power flow balance equality constraints and inequality box constraints on the actions for feasibility.

| Task                            | Metrics      | CPO              | CUP              | Safety Layer     | DDPG-L           | SAC-L            | RPO-DDPG(*)       | RPO-SAC(*)       |
|---------------------------------|--------------|------------------|------------------|------------------|------------------|------------------|-------------------|------------------|
| Safe CartPole                   | Ep. reward   | 20.1000(2.9138)  | 63.9000(15.0629) | 53.8000(25.7364) | 15.5000(1.7464)  | 40.5000(15.5772) | 200.0000(0.0000)  | 200.0000(0.0000) |
|                                 | Max In. ineq | 0.0000(0.0000)   | 0.0000(0.0000)   | 0.0086(0.0153)   | 0.0000(0.0000)   | 0.0000(0.0000)   | 0.0000(0.0000)    | 0.0000(0.0000)   |
|                                 | Max In. eq   | 0.0389(0.0155)   | 0.5344(0.0148)   | 1.7099(1.8248)   | 0.0408(0.0055)   | 0.0487(0.0126)   | 0.0000(0.0000)    | 0.0000(0.0000)   |
|                                 | Max Ep. ineq | 0.0000(0.0000)   | 0.0000(0.0000)   | 0.7904(1.6355)   | 0.0000(0.0000)   | 0.0000(0.0000)   | 0.0000(0.0000)    | 0.0000(0.0000)   |
|                                 | Max Ep. eq   | 0.1096(0.0217)   | 0.0000(0.0000)   | 13.6603(0.0000)  | 0.1180(0.0131)   | 0.1038(0.0645)   | 0.0000(0.0000)    | 0.0000(0.0000)   |
| Spring Pendulum                 | Ep. reward   | 15.4687(12.7866) | 0.8599(0.5242)   | 1.1155(0.6959)   | 76.4383(27.4531) | 149.6762(4.2608) | 175.1558(15.1087) | 182.4221(2.8414) |
|                                 | Max In. ineq | 0.0000(0.0000)   | 0.0000(0.0000)   | 6.0975(6.8860)   | 0.0000(0.0000)   | 0.0000(0.0000)   | 0.0000(0.0000)    | 0.0000(0.0000)   |
|                                 | Max In. eq   | 0.7274(0.4259)   | 9.5898(2.6630)   | 3.9134(2.8721)   | 0.3805(0.0441)   | 0.0078(0.0013)   | 0.0000(0.0000)    | 0.0000(0.0000)   |
|                                 | Max Ep. ineq | 0.0000(0.0000)   | 0.0000(0.0000)   | 36.9545(9.1365)  | 0.0000(0.0000)   | 0.0000(0.0000)   | 0.0000(0.0000)    | 0.0000(0.0000)   |
|                                 | Max Ep. eq   | 1.9064(0.7869)   | 16.3114(4.9027)  | 25.2101(10.1734) | 1.0905(0.5024)   | 0.0837(0.0809)   | 0.0000(0.0000)    | 0.0000(0.0000)   |
| OPF with Battery Energy Storage | Ep. reward   | -10.3469(1.3825) | -5.8377(0.9521)  | -24.1147(8.9916) | -22.0649(0.9199) | -19.4738(2.0778) | 42.9710(17.8438)  | 42.0764(10.1048) |
|                                 | Max In. ineq | 0.0000(0.0000)   | 0.0000(0.0000)   | 0.0000(0.0000)   | 0.0000(0.0000)   | 0.0000(0.0000)   | 0.0002(0.0004)    | 0.0003(0.0005)   |
|                                 | Max In. eq   | 0.4413(0.0215)   | 0.4866(0.0136)   | 11.4698(10.7497) | 0.1348(0.0136)   | 0.1908(0.0203)   | 0.0001(0.0000)    | 0.0000(0.0000)   |
|                                 | Max Ep. ineq | 0.0000(0.0000)   | 0.0000(0.0000)   | 0.0000(0.0000)   | 0.0000(0.0000)   | 0.0000(0.0000)   | 0.0042(0.0094)    | 0.0046(0.0060)   |
|                                 | Max Ep. eq   | 0.6821(0.0523)   | 0.6827(0.0612)   | 69.9568(6.0647)  | 0.2845(0.0484)   | 0.3994(0.1243)   | 0.0003(0.0001)    | 0.0002(0.0001)   |

Table 2: Mean evaluation performance of different algorithms in the three benchmarks. We compare the performance of RPO (RPODDPG, RPOSAC) with the abridged version of our algorithm (DDPG-L, SAC-L) and other Safe RL algorithms (CPO, CUP, Safety Layer) according to episodic reward and max instantaneous & episodic constraint violation for equality and inequality constraints. Each item in the table is averaged across 10 runs with the standard deviations shown in the parentheses.



## 5.2 Evaluation Metrics

We use three metrics to evaluate the algorithms as follows:

**Episodic Reward:** cumulative reward in a whole episode.

**Max Instantaneous Constraint Violation:** maximum instantaneous violation of all constraints. It denotes the feasibility of actions in a state because the feasibility of actions relies on the constraint that is the most difficult to be satisfied.

**Max Episodic Constraint Violation:** maximum episodic violation of all constraints. Similar to Mean Constraint Violation, it denotes the feasibility of actions in a whole episode.

## 5.3 Performance of RPO on Reward and Constraints

We plot the learning curves of CPO, CUP, Safety Layer, DDPG-L, SAC-L, RPODDPG, and RPOSAC in Figure 3. Given the fairness of our experiments, we apply the same shared hyper-parameters for all the algorithms. This empirical result reflects that existing Safe RL algorithms cannot handle the MDP problems with hard constraints, and our approach outperforms other algorithms in terms of both episodic reward and the max constraint violation. Moreover, the learning curves confirm that RPO can also guarantee certain feasibility during the training period.

Besides the learning curves, Table 2 shows the performance of different algorithms after convergence. To present more details on the constraint violations, here the equality and inequality constraint violations are shown separately. Notably, since the *tanh* and state-dependent *tanh* activation function are added to limit the output of the neural network for the box constraints, therefore no inequality constraints need to be satisfied for DDPG-L, SAC-L, and three Safe RL algorithms. That’s why these two algorithms achieve zero violation in the inequality constraints in OPF with Battery Energy Storage. However, it is hard for them to satisfy both equality and inequality constraints in OPF with Battery Energy Storage.

## 6 Limitation and Future Work

We acknowledge that there still exist some limitations in RPO. One is that RPO is time-consuming compared to standard neural networks due to the projection stage, where the GRG updates may need to be performed several times. Another is that the equality equation solver required in the construction stage may need to be either chosen or specially designed with domain knowledge. Hence, accelerating RPO and developing more powerful RL algorithms that can handle hard constraints are under consideration in our future works. Besides, while we only validate RPO in RL benchmarks with hard constraints, our method can also be easily extended to cases with both hard constraints and soft constraints as long as a neural network is utilized to fit the mapping between the state-action pair and the cost.

## 7 Conclusion

In this paper, we outlined a novel algorithm called RPO to handle general hard constraints under the off-policy reinforcement learning framework. RPO consists of two stages, the construction stage for equality constraints and the projection stage for inequality constraints. Specifically, the construction stage first predicts the basic actions, then calculates the nonbasic action through an equation-solving procedure, and finally concatenates them as the output of the construction stage. The projection stage applies GRG updates to the concatenated actions until all the inequality constraints are satisfied. Furthermore, we also design a special augmented loss function with the exact penalty term and illustrate how to fuse RPO with the off-policy RL training process. Finally, to validate our method and facilitate the research in RL with hard constraints, we have also designed three benchmarks according to the physical nature of the real-world applications, including Safe CartPole, Spring Pendulum, and Optimal Power Flow with Battery Energy Storage. Experimental results in these benchmarks demonstrate the superiority of RPO in terms of both episodic reward and constraint violation.

## References

- [1] Electricity - u.s. energy information administration (eia). <https://www.eia.gov/electricity/>. Accessed November 10, 2022 [online].
- [2] Nord pool. <https://www.nordpoolgroup.com/>. Accessed November 10, 2022 [online].
- [3] Jean Abadie. Generalization of the wolfe reduced gradient method to the case of nonlinear constraints. *Optimization*, pages 37–47, 1969.
- [4] Joshua Achiam, David Held, Aviv Tamar, and Pieter Abbeel. Constrained policy optimization. In *International conference on machine learning*, pages 22–31. PMLR, 2017.
- [5] Dima Waleed Hanna Alrabadi. Portfolio optimization using the generalized reduced gradient nonlinear algorithm: An application to amman stock exchange. *International Journal of Islamic and Middle Eastern Finance and Management*, 9(4):570–582, 2016.
- [6] Eitan Altman. *Constrained Markov decision processes: stochastic modeling*. Routledge, 1999.
- [7] Brandon Amos and J Zico Kolter. Optnet: Differentiable optimization as a layer in neural networks. In *International Conference on Machine Learning*, pages 136–145. PMLR, 2017.
- [8] Abhinav Bhatia, Pradeep Varakantham, and Akshat Kumar. Resource constrained deep reinforcement learning. In *Proceedings of the International Conference on Automated Planning and Scheduling*, volume 29, pages 610–620, 2019.
- [9] Steven Bohez, Abbas Abdolmaleki, Michael Neunert, Jonas Buchli, Nicolas Heess, and Raia Hadsell. Value constrained model-free continuous control. *arXiv preprint arXiv:1902.04623*, 2019.
- [10] Greg Brockman, Vicki Cheung, Ludwig Pettersson, Jonas Schneider, John Schulman, Jie Tang, and Wojciech Zaremba. Openai gym. *arXiv preprint arXiv:1606.01540*, 2016.
- [11] Yinlam Chow, Mohammad Ghavamzadeh, Lucas Janson, and Marco Pavone. Risk-constrained reinforcement learning with percentile risk criteria. *The Journal of Machine Learning Research*, 18(1):6070–6120, 2017.
- [12] Yinlam Chow, Ofir Nachum, Edgar Duenez-Guzman, and Mohammad Ghavamzadeh. A lyapunov-based approach to safe reinforcement learning. *Advances in neural information processing systems*, 31, 2018.
- [13] Yinlam Chow, Ofir Nachum, Aleksandra Faust, Edgar Duenez-Guzman, and Mohammad Ghavamzadeh. Lyapunov-based safe policy optimization for continuous control. *arXiv preprint arXiv:1901.10031*, 2019.
- [14] Gal Dalal, Krishnamurthy Dvijotham, Matej Vecerik, Todd Hester, Cosmin Paduraru, and Yuval Tassa. Safe exploration in continuous action spaces. *arXiv preprint arXiv:1801.08757*, 2018.
- [15] C Yu David, John E Fagan, Bobbie Foote, and Adel A Aly. An optimal load flow study by the generalized reduced gradient approach. *Electric Power Systems Research*, 10(1):47–53, 1986.
- [16] Priya L Donti, David Rolnick, and J Zico Kolter. Dc3: A learning method for optimization with hard constraints. In *International Conference on Learning Representations*, 2020.
- [17] Razvan V Florian. Correct equations for the dynamics of the cart-pole system. *Center for Cognitive and Neural Studies (Coneural), Romania*, 2007.
- [18] Sehoon Ha, Peng Xu, Zhenyu Tan, Sergey Levine, and Jie Tan. Learning to walk in the real world with minimal human effort. In *Conference on Robot Learning*, pages 1110–1120. PMLR, 2021.
- [19] Tuomas Haarnoja, Aurick Zhou, Pieter Abbeel, and Sergey Levine. Soft actor-critic: Off-policy maximum entropy deep reinforcement learning with a stochastic actor. In *International conference on machine learning*, pages 1861–1870. PMLR, 2018.

- [20] Qingkai Liang, Fanyu Que, and Eytan Modiano. Accelerated primal-dual policy optimization for safe reinforcement learning. *arXiv preprint arXiv:1802.06480*, 2018.
- [21] Timothy P Lillicrap, Jonathan J Hunt, Alexander Pritzel, Nicolas Heess, Tom Erez, Yuval Tassa, David Silver, and Daan Wierstra. Continuous control with deep reinforcement learning. In *ICLR (Poster)*, 2016.
- [22] Puze Liu, Davide Tateo, Haitham Bou Ammar, and Jan Peters. Robot reinforcement learning on the constraint manifold. In *Conference on Robot Learning*, pages 1357–1366. PMLR, 2022.
- [23] Yongshuai Liu, Jiaxin Ding, and Xin Liu. Ipo: Interior-point policy optimization under constraints. In *Proceedings of the AAAI Conference on Artificial Intelligence*, volume 34, pages 4940–4947, 2020.
- [24] Zuxin Liu, Zhepeng Cen, Vladislav Isenbaev, Wei Liu, Steven Wu, Bo Li, and Ding Zhao. Constrained variational policy optimization for safe reinforcement learning. In *International Conference on Machine Learning*, pages 13644–13668. PMLR, 2022.
- [25] David G Luenberger, Yinyu Ye, et al. *Linear and nonlinear programming*, volume 2. Springer, 1984.
- [26] Haitong Ma, Yang Guan, Shegnbo Eben Li, Xiangteng Zhang, Sifa Zheng, and Jianyu Chen. Feasible actor-critic: Constrained reinforcement learning for ensuring statewise safety. *arXiv preprint arXiv:2105.10682*, 2021.
- [27] Tu-Hoa Pham, Giovanni De Magistris, and Ryuki Tachibana. Optlayer-practical constrained optimization for deep reinforcement learning in the real world. In *2018 IEEE International Conference on Robotics and Automation (ICRA)*, pages 6236–6243. IEEE, 2018.
- [28] Yann Riffonneau, Seddik Bacha, Franck Barruel, and Stephane Ploix. Optimal power flow management for grid connected pv systems with batteries. *IEEE Transactions on sustainable energy*, 2(3):309–320, 2011.
- [29] Keith Rudd, Greg Foderaro, Pingping Zhu, and Silvia Ferrari. A generalized reduced gradient method for the optimal control of very-large-scale robotic systems. *IEEE transactions on robotics*, 33(5):1226–1232, 2017.
- [30] Shah Sanket, Arunesh Sinha, Pradeep Varakantham, Perrault Andrew, and Milind Tambe. Solving online threat screening games using constrained action space reinforcement learning. In *Proceedings of the AAAI Conference on Artificial Intelligence*, volume 34, pages 2226–2235, 2020.
- [31] Ahmed Rabee Sayed, Cheng Wang, Hussein Anis, and Tianshu Bi. Feasibility constrained online calculation for real-time optimal power flow: A convex constrained deep reinforcement learning approach. *IEEE Transactions on Power Systems*, 2022.
- [32] Shai Shalev-Shwartz, Shaked Shammah, and Amnon Shashua. Safe, multi-agent, reinforcement learning for autonomous driving. *arXiv preprint arXiv:1610.03295*, 2016.
- [33] Li Shen, Long Yang, Shixiang Chen, Bo Yuan, Xueqian Wang, Dacheng Tao, et al. Penalized proximal policy optimization for safe reinforcement learning. *arXiv preprint arXiv:2205.11814*, 2022.
- [34] Ye Shi, Hoang Duong Tuan, Andrey V Savkin, Trung Q Duong, and H Vincent Poor. Model predictive control for smart grids with multiple electric-vehicle charging stations. *IEEE Transactions on Smart Grid*, 10(2):2127–2136, 2018.
- [35] M Shivashankar, Manish Pandey, and Mohammad Zakwan. Estimation of settling velocity using generalized reduced gradient (grg) and hybrid generalized reduced gradient–genetic algorithm (hybrid grg-ga). *Acta Geophysica*, 70(5):2487–2497, 2022.
- [36] David Silver, Julian Schrittwieser, Karen Simonyan, Ioannis Antonoglou, Aja Huang, Arthur Guez, Thomas Hubert, Lucas Baker, Matthew Lai, Adrian Bolton, et al. Mastering the game of go without human knowledge. *nature*, 550(7676):354–359, 2017.

- 429 [37] Adam Stooke, Joshua Achiam, and Pieter Abbeel. Responsive safety in reinforcement learning  
430 by pid lagrangian methods. In *International Conference on Machine Learning*, pages 9133–9143.  
431 PMLR, 2020.
- 432 [38] Richard S Sutton and Andrew G Barto. *Reinforcement learning: An introduction*. MIT press,  
433 2018.
- 434 [39] Chen Tessler, Daniel J Mankowitz, and Shie Mannor. Reward constrained policy optimization.  
435 In *International Conference on Learning Representations*, 2018.
- 436 [40] Brijen Thananjeyan, Ashwin Balakrishna, Suraj Nair, Michael Luo, Krishnan Srinivasan, Minh  
437 Hwang, Joseph E Gonzalez, Julian Ibarz, Chelsea Finn, and Ken Goldberg. Recovery rl: Safe  
438 reinforcement learning with learned recovery zones. *IEEE Robotics and Automation Letters*,  
439 6(3):4915–4922, 2021.
- 440 [41] Akifumi Wachi and Yanan Sui. Safe reinforcement learning in constrained markov decision  
441 processes. In *International Conference on Machine Learning*, pages 9797–9806. PMLR, 2020.
- 442 [42] Akifumi Wachi, Yanan Sui, Yisong Yue, and Masahiro Ono. Safe exploration and optimization  
443 of constrained mdps using gaussian processes. In *Proceedings of the AAAI Conference on*  
444 *Artificial Intelligence*, volume 32, 2018.
- 445 [43] Ziming Yan and Yan Xu. A hybrid data-driven method for fast solution of security-constrained  
446 optimal power flow. *IEEE Transactions on Power Systems*, 2022.
- 447 [44] Long Yang, Jiaming Ji, Juntao Dai, Linrui Zhang, Binbin Zhou, Pengfei Li, Yaodong Yang, and  
448 Gang Pan. Constrained update projection approach to safe policy optimization. *arXiv preprint*  
449 *arXiv:2209.07089*, 2022.
- 450 [45] Tsung-Yen Yang, Justinian Rosca, Karthik Narasimhan, and Peter J Ramadge. Projection-based  
451 constrained policy optimization. In *International Conference on Learning Representations*,  
452 2019.
- 453 [46] Linrui Zhang, Qin Zhang, Li Shen, Bo Yuan, Xueqian Wang, and Dacheng Tao. Evaluating  
454 model-free reinforcement learning toward safety-critical tasks. *arXiv preprint arXiv:2212.05727*,  
455 2022.
- 456 [47] Yiming Zhang, Quan Vuong, and Keith Ross. First order constrained optimization in policy  
457 space. *Advances in Neural Information Processing Systems*, 33:15338–15349, 2020.
- 458 [48] Yuhao Zhou, Bei Zhang, Chunlei Xu, Tu Lan, Ruisheng Diao, Di Shi, Zhiwei Wang, and Wei-  
459 Jen Lee. A data-driven method for fast ac optimal power flow solutions via deep reinforcement  
460 learning. *Journal of Modern Power Systems and Clean Energy*, 8(6):1128–1139, 2020.

## 461 A Proofs

### 462 A.1 Proof of Proposition 1

463 **Proposition 1. (Gradient Flow in Construction Stage)** Assume that we have  $(n - m)$  equality  
 464 constraints denoted as  $F(a; s) = \mathbf{0}$  in each state  $s$ . Let  $a^B \in \mathbb{R}^m$  and  $a \in \mathbb{R}^n$  be the basic actions  
 465 and integrated actions, respectively. Let  $a^N = \phi_N(a^B) \in \mathbb{R}^{n-m}$  denote the nonbasic actions where  
 466  $\phi_N$  is the implicit function that determined by the  $n - m$  equality constraints. Then, we have

$$\frac{\partial \phi_N(a^B)}{\partial a^B} = - (J_{:,m+1:n}^F)^{-1} J_{:,1:m}^F \quad (10)$$

467 where  $J^F = \frac{\partial F(a; s)}{\partial a} \in \mathbb{R}^{(m-n) \times n}$ ,  $J_{:,1:m}^F$  is the first  $m$  columns of  $J^F$  and  $J_{:,m+1:n}^F$  is the last  
 468  $(n - m)$  columns of  $J^F$ .

469 *Proof.* Considering an equality-constrained optimization problem, the reduced gradient [25] is  
 470 defined as

$$\mathbf{r}^T = \nabla_{\mathbf{x}^B} f(\mathbf{x}^N, \mathbf{x}^B) + \lambda^T \nabla_{\mathbf{x}^B} \mathbf{h}(\mathbf{x}^N, \mathbf{x}^B), \quad (11)$$

471 where  $\lambda^T$  should satisfy  $\nabla_{\mathbf{x}^N} f(\mathbf{x}^N, \mathbf{x}^B) + \lambda^T \nabla_{\mathbf{x}^N} \mathbf{h}(\mathbf{x}^N, \mathbf{x}^B) = 0$ .  $\mathbf{f}, \mathbf{h}$  denote the objective  
 472 function and the equality constraints, and  $\mathbf{x}^B, \mathbf{x}^N$  are the basic variables and nonbasic variables  
 473 respectively.

474 Finally, we will obtain

$$\mathbf{r}^T = \nabla_{\mathbf{x}^B} f(\mathbf{x}^N, \mathbf{x}^B) - \nabla_{\mathbf{x}^N} f(\mathbf{x}^N, \mathbf{x}^B) [\nabla_{\mathbf{x}^N} \mathbf{h}(\mathbf{x}^N, \mathbf{x}^B)]^{-1} \nabla_{\mathbf{x}^B} \mathbf{h}(\mathbf{x}^N, \mathbf{x}^B). \quad (12)$$

475 Similarly, the gradient flow from the nonbasic actions to basic actions is

$$\frac{\partial \phi_N(a^B)}{\partial a^B} = - (J_{:,m+1:n}^F)^{-1} J_{:,1:m}^F. \quad (13)$$

476 □

### 477 A.2 Proof of Theorem 1

478 **Theorem 1. (GRG update in Tangent Space)** If  $\Delta a^N = \frac{\partial \phi_N(a^B)}{\partial a^B} \Delta a^B$ , the GRG update for inequal-  
 479 ity constraints is in the tangent space of the manifold determined by linear equality constraints.

480 *Proof.* Firstly, assume the tangent space of the actions in the manifold defined by the equality  
 481 constraints is  $J^F a = d$  where  $a = [a^B, a^N] = [a^B, \phi_N(a^B)]$ ,  $a^B \in \mathbb{R}^m$ ,  $\phi_N(a^N) \in \mathbb{R}^{n-m}$ .

482 According to Proposition 1, we have

$$\frac{\partial \phi_N(a^B)}{\partial a^B} = - (J_{:,m+1:n}^F)^{-1} J_{:,1:m}^F. \quad (14)$$

483 Then, we define the projection objective as  $\mathcal{G}(a^B, a^N) \triangleq \sum_j \max \{0, g_j(a; s)\}$  and obtain

$$\begin{aligned} \nabla_{a^B} \mathcal{G}(a^B, a^N) &\triangleq \frac{\partial \mathcal{G}(a^B, a^N)}{\partial a^B} + \frac{\partial \phi_N(a^B)}{\partial a^B} \frac{\partial \mathcal{G}(a^B, a^N)}{\partial a^N} \\ \Delta a^B &= \nabla_{a^B} \mathcal{G}(a^B, a^N), \Delta a^N = \frac{\partial \phi_N(a^B)}{\partial a^B} \Delta a^B. \end{aligned} \quad (15)$$

484 Finally, we have

$$\begin{aligned}
J^F \Delta a &= [J_{:,1:m}^F, J_{:,m+1:n}^F] \begin{bmatrix} \Delta a^B \\ \Delta a^N \end{bmatrix} \\
&= [J_{:,1:m}^F, J_{:,m+1:n}^F] \begin{bmatrix} \Delta a^B \\ \Delta \phi_N(a^B) \end{bmatrix} \\
&= J_{:,1:m}^F \Delta a^B + J_{:,m+1:n}^F \Delta \phi_N(a^B) \\
&= J_{:,1:m}^F \Delta a^B + J_{:,m+1:n}^F \frac{\partial \phi_r(a^B)}{\partial a^B} \Delta a^B \\
&= J_{:,1:m}^F \nabla_{a^B} \mathcal{G}(a^B, a^N) + J_{:,m+1:n}^F \frac{\partial \phi_r(a^B)}{\partial a^B} \nabla_{a^B} \mathcal{G}(a^B, a^N) \\
&= J_{:,1:m}^F \left( \frac{\partial \mathcal{G}(a^B, a^N)}{\partial a^B} + \frac{\partial \mathcal{G}(a^B, a^N)}{\partial \phi_N(a^B)} \frac{\partial \phi_N(a^B)}{\partial a^B} \right) \\
&\quad + J_{:,m+1:n}^F \frac{\partial \phi_r(a^B)}{\partial a^B} \left( \frac{\partial \mathcal{G}(a^B, a^N)}{\partial a^B} + \frac{\partial \mathcal{G}(a^B, a^N)}{\partial \phi_N(a^B)} \frac{\partial \phi_N(a^B)}{\partial a^B} \right) \\
&= J_{:,1:m}^F \frac{\partial \mathcal{G}(a^B, a^N)}{\partial a^B} - J_{:,1:m}^F \frac{\partial \mathcal{G}(a^B, a^N)}{\partial \phi_N(a^B)} (J_{:,m+1:n}^F)^{-1} J_{:,1:m}^F \\
&\quad - J_{:,1:m}^F \frac{\partial \mathcal{G}(a^B, a^N)}{\partial a^B} + J_{:,m+1:n}^F \frac{\partial \mathcal{G}(a^B, a^N)}{\partial \phi_N(a^B)} (J_{:,m+1:n}^F)^{-1} J_{:,1:m}^F \\
&= 0.
\end{aligned} \tag{16}$$

485

□

### 486 A.3 Proof of Theorem 2

487 **Theorem 2. (Exact Penalty Theorem)** Assume  $\nu_s^j$  is the Lagrangian multiplier vector corresponding  
488 to  $j$ th constraints in state  $s$ . If the penalty factor  $\nu^j \geq \|\nu_s^j\|_\infty$ , the unconstrained problem (8) is  
489 equivalent to the constrained problem (7).

490 *Proof.* Since  $\nu^j \geq \|\nu_s^j\|_\infty$ , we have

$$\tilde{\mathcal{L}}(\theta) \geq -J_R(\tilde{\pi}_\theta) + \mathbb{E}_{s \sim \pi} \left[ \sum_j \sum_s \nu_s^j \max \{0, g_j(\tilde{\pi}(s); s)\} \right]. \tag{17}$$

491 The equality holds when all the inequality constraints are satisfied. Here

$$\nu_s^j \triangleq \operatorname{argmax}_{\nu_s^j} \left\{ \min_{\theta} -J_R(\tilde{\pi}_\theta) + \mathbb{E}_{s \sim \pi} \left[ \sum_j \sum_s \nu_s^j \max \{0, g_j(\tilde{\pi}(s); s)\} \right] \right\}. \tag{18}$$

492 Therefore, the unconstrained problem  $\min_{\theta} -J_R(\tilde{\pi}_\theta) + \mathbb{E}_{s \sim \pi} \left[ \sum_j \sum_s \nu_s^j \max \{0, g_j(\tilde{\pi}(s); s)\} \right]$  is  
493 equivalent to the constrained problem (7). Let  $\theta^*$  be the optimal solution of the unconstrained  
494 problem. Then, we have

$$\begin{aligned}
\tilde{\mathcal{L}}(\theta^*) &= -J_R(\tilde{\pi}_{\theta^*}) + \mathbb{E}_{s \sim \pi} \left[ \sum_j \sum_s \nu_s^j \max \{0, g_j(\tilde{\pi}_{\theta^*}(s); s)\} \right] \\
&\leq -J_R(\tilde{\pi}_\theta) + \mathbb{E}_{s \sim \pi} \left[ \sum_j \sum_s \nu_s^j \max \{0, g_j(\tilde{\pi}(s); s)\} \right] \\
&\leq \tilde{\mathcal{L}}(\theta)
\end{aligned} \tag{19}$$

495 Hence, the unconstrained problem (8) is equivalent to the constrained problem (7).

□

#### 496 A.4 Limitations of $\ell_2$ Norm Objectives

497 Projection with  $\ell_2$  norm objectives will never come into the feasible region defined by inequality  
 498 constraints with a sufficiently small projection step.

499 Assume that the inequality constraint that needs to satisfy is  $g(a; s) \leq 0$ . For a given action  $a_k$   
 500 that does not satisfy the inequality constraint after  $k$  updates, i.e.,  $g(a_k) > 0$ . If  $a_k$  comes close  
 501 enough to the feasible region by using the  $\ell_2$  norm objective, we apply a linear approximation on  
 502  $g(a_k) \approx c^T a_k - b$  and then obtain

$$\begin{aligned} g(a_{k+1}) &= g(a_k - \Delta a) \\ &= c^T (a_k - \eta_a \nabla_a \|c^T a_k - b\|_2^2) - b \\ &= c^T (a_k - 2\eta_a c(c^T a_k - b)) - b \\ &= c^T (a_k - 2\eta_a g(a_k) c) - b \\ &= g(a_k)(1 - 2\eta_a c^T c). \end{aligned} \tag{20}$$

503 Obviously, to ensure the satisfaction of the inequality constraint, i.e.,  $g(a_{k+1}) \leq 0$ , we must limit  
 504 the projection step with  $\eta_a \geq 1/(2c^T c)$ . However,  $\eta_a$  is often a sufficiently small number for the  
 505 satisfaction of nonlinear equality constraints. In this case, the inequality constraints will never be  
 506 satisfied with a sufficiently small projection step.

#### 507 B GRG algorithm

508 The GRG algorithm is shown as Algorithm 2.

---

##### Algorithm 2 Generalized Reduced Gradient Algorithm

---

**Input:** Optimization problem  $\min_{\mathbf{x} \in \mathbb{R}^n} f(\mathbf{x})$ , s.t.  $\mathbf{h}(\mathbf{x}) = \mathbf{0} \in \mathbb{R}^m$ ,  $\mathbf{a} \leq \mathbf{x} \leq \mathbf{b}$ .

**Output:** Optimal solution  $\mathbf{x}$ .

**Assumptions:**

1. Divide  $\mathbf{x}$  into  $\mathbf{x} = (\mathbf{x}^N, \mathbf{x}^B)$ , where  $\mathbf{x}^N \in \mathbb{R}^m$ ,  $\mathbf{x}^B \in \mathbb{R}^{n-m}$ .
2. If  $(\mathbf{a}^N, \mathbf{a}^B)$  and  $(\mathbf{b}^N, \mathbf{b}^B)$  are the corresponding partitions of  $\mathbf{a}, \mathbf{b}$ , then  $\mathbf{a}^N \leq \mathbf{x}^N \leq \mathbf{b}^N$ .
3. The  $m \times m$  matrix  $\nabla_{\mathbf{x}^N} \mathbf{h}(\mathbf{x}^N, \mathbf{x}^B)$  is nonsingular at  $\mathbf{x} = (\mathbf{x}^N, \mathbf{x}^B)$ .

1: Define the reduced gradient (with respect to  $\mathbf{x}^N$ ) as

$$\mathbf{r}^T = \nabla_{\mathbf{x}^B} f(\mathbf{x}^N, \mathbf{x}^B) + \lambda^T \nabla_{\mathbf{x}^B} \mathbf{h}(\mathbf{x}^N, \mathbf{x}^B), \text{ where } \nabla_{\mathbf{x}^N} f(\mathbf{x}^N, \mathbf{x}^B) + \lambda^T \nabla_{\mathbf{x}^N} \mathbf{h}(\mathbf{x}^N, \mathbf{x}^B) = \mathbf{0}.$$

2: Obtain  $\mathbf{r}^T = \nabla_{\mathbf{x}^B} f(\mathbf{x}^N, \mathbf{x}^B) - \nabla_{\mathbf{x}^N} f(\mathbf{x}^N, \mathbf{x}^B) [\nabla_{\mathbf{x}^N} \mathbf{h}(\mathbf{x}^N, \mathbf{x}^B)]^{-1} \nabla_{\mathbf{x}^B} \mathbf{h}(\mathbf{x}^N, \mathbf{x}^B)$ .

3: Let

$$\Delta x_i^B = \begin{cases} -r_i & \text{if } r_i < 0, x_i^B < B^B \text{ or } r_i > 0, x_i^B > a^B \\ 0 & \text{otherwise} \end{cases},$$

$$\Delta \mathbf{x}^N = -[\nabla_{\mathbf{x}^N} \mathbf{h}]^{-1} \nabla_{\mathbf{x}^B} \mathbf{h} \Delta \mathbf{x}^B.$$

4: Find  $\alpha_1, \alpha_2, \alpha_3$  that respectively satisfy

$$\begin{aligned} &\max\{\alpha : \mathbf{a}^N \leq \mathbf{x}^N + \alpha \Delta \mathbf{x}^N \leq \mathbf{b}^N\}, \\ &\max\{\alpha : \mathbf{a}^B \leq \mathbf{x}^B + \alpha \Delta \mathbf{x}^B \leq \mathbf{b}^B\}, \\ &\min\{f(\mathbf{x} + \alpha \Delta \mathbf{x}) : 0 \leq \alpha \leq \alpha_1, 0 \leq \alpha \leq \alpha_2\}. \end{aligned}$$

5: Update

$$\begin{aligned} \mathbf{x}^B &\leftarrow \mathbf{x}^B + \alpha_3 \Delta \mathbf{x}^B \\ \mathbf{x}^N &\leftarrow \mathbf{x}^N + \alpha_3 \Delta \mathbf{x}^N \end{aligned}$$

6: Perform (1)-(5) until convergence.

---

## 509 C Algorithm Details

510 We present the concrete algorithm about how RPODDPG and RPOSAC work in Algorithm 3 and  
511 Algorithm 4.

---

### Algorithm 3 RPO-DDPG

---

**Input:** Initial parameters  $\theta, \omega$  of policy network  $\mu$  and value network  $Q$ .

- 1: Initialize the corresponding target network  $\theta' \leftarrow \theta, \omega' \leftarrow \omega$ .
- 2: Initialize replay buffer  $\mathcal{D}$ .
- 3: Initialize penalty factor for inequality constraints  $\nu \leftarrow \mathbf{0}$ .
- 4: **for** each episode **do**
- 5:   **for** each environment epoch **do**
- 6:     Select partial action  $a_t^B = \mu_\theta(s_t) + \mathcal{N}(0, \epsilon_t)$ .
- 7:     Employ construction stage by solving the equations defined equality constraints
 
$$\tilde{a}_t = [a_t^B \quad \phi_N(a_t^B)].$$
- 8:     Employ projection stage on the concatenated action  $\tilde{a}_t$  to obtain feasible action  $a_t$
- 9:     **for**  $k = 1, \dots, K$  **do**

$$\begin{aligned} \Delta a_{t,k}^B &= \nabla_{a^B} \mathcal{G}(a^B, a^N), & \Delta a_{t,k}^N &= \frac{\partial \phi_N(a^B)}{\partial a^B} \Delta a_{t,k}^B, \\ a_{t,k+1}^B &= a_{t,k}^B - \eta_a \Delta a_{t,k}^B, & a_{t,k+1}^N &= a_{t,k}^N - \eta_a \Delta a_{t,k}^N. \end{aligned}$$

- 10:   **end for**
- 11:   Execute action  $a_t$  and observe reward  $r_t$  and next state  $s_{t+1}$ .
- 12:   Store the transition  $\langle s_t, a_t, r_t, s_{t+1} \rangle$  in  $\mathcal{D}$ .
- 13:   Sample a mini-batch of transitions in  $\mathcal{D}$ .
- 14:   Update actor and reward critic networks

$$\begin{aligned} \theta &\leftarrow \theta + \eta_\mu \hat{\nabla}_\theta \mathbb{E}_{\mathcal{D}} \left[ Q_\omega(s_t, \tilde{\pi}_\theta(s_t)) - \sum_j \nu^j \max \{0, g_j(\tilde{\pi}_\theta(s_t); s_t)\} \right], \\ \omega &\leftarrow \omega - \eta_Q \hat{\nabla}_\omega \mathbb{E}_{\mathcal{D}} [Q_\omega(s_t, a_t) - (r_t + \gamma Q_{\omega'}(s_{t+1}, \pi_{\theta'}(s_{t+1})))]^2. \end{aligned}$$

- 15:   Perform dual update on  $\nu$

$$\nu_{k+1}^j = \nu_k^j + \eta_\nu \mathbb{E}_{s \sim \pi} [\max \{0, g_j(\tilde{\pi}(s_t); s_t)\}] \quad \forall j.$$

- 16:   Soft update target networks:

$$\begin{aligned} \theta' &\leftarrow \tau \theta + (1 - \tau) \theta', \\ \omega' &\leftarrow \tau \omega + (1 - \tau) \omega'. \end{aligned}$$

- 17:   **end for**
  - 18: **end for**
- 

## 512 D Benchmark Details

513 In this section, we will illustrate the dynamics of our three benchmarks in detail.

### 514 D.1 Safe CartPole

515 Different from the CartPole environment in Gym [10], two forces from different directions are  
516 controlled in the Safe CartPole environment.

517 **State.** The state space  $|S| \in \mathbb{R}^6$  of Safe CartPole includes the position, velocity, and acceleration of  
518 the cart; and the angle, angular velocity, and angular acceleration of the pole.



---

**Algorithm 4** RPO-SAC

---

**Input:** Initial parameters  $\theta, \omega_1, \omega_2$  of policy network  $\mu$  and value network  $Q_1, Q_2$ , Temperature parameter  $\alpha$ .

1: Initialize the corresponding target network  $\omega'_1 \leftarrow \omega_1, \omega'_2 \leftarrow \omega_2$ .

2: Initialize replay buffer  $\mathcal{D}$ .

3: Initialize penalty factor for inequality constraints  $\nu \leftarrow \mathbf{0}$ .

4: **for** each episode **do**

5:   **for** each environment epoch **do**

6:     Select partial action  $a_t^B \sim \mu_\theta(a_t^B | s_t)$ .

7:     Employ construction stage by solving the equations defined equality constraints

$$\tilde{a}_t = \begin{bmatrix} a_t^B & \phi_N(a_t^B) \end{bmatrix}.$$

8:     Employ projection stage on the concatenated action  $\tilde{a}_t$  to obtain feasible action  $a_t$

9:     **for**  $k = 1, \dots, K$  **do**

$$\begin{aligned} \Delta a_{t,k}^B &= \nabla_{a^B} \mathcal{G}(a^B, a^N), & \Delta a_{t,k}^N &= \frac{\partial \phi_N(a^B)}{\partial a^B} \Delta a_{t,k}^B, \\ a_{t,k+1}^B &= a_{t,k}^B - \eta_a \Delta a_{t,k}^B, & a_{t,k+1}^N &= a_{t,k}^N - \eta_a \Delta a_{t,k}^N. \end{aligned}$$

10:   **end for**

11:   Execute action  $a_t$  and observe reward  $r_t$  and next state  $s_{t+1}$ .

12:   Store the transition  $\langle s_t, a_t, r_t, s_{t+1} \rangle$  in  $\mathcal{D}$ .

13:   Sample a mini-batch of transitions in  $\mathcal{D}$ .

14:   Update actor and reward critic networks

$$\theta \leftarrow \theta + \eta_\mu \hat{\nabla}_\theta \mathbb{E}_{\mathcal{D}} \left[ -\alpha \log(\mu_\theta(a_t | s_t)) + Q_\omega(s_t, \tilde{\pi}_\theta(s_t)) - \sum_j \nu^j \max\{0, g_j(\tilde{\pi}_\theta(s_t); s_t)\} \right],$$

$$\omega_i \leftarrow \omega_i - \eta_Q \hat{\nabla}_{\theta Q} \mathbb{E}_{\mathcal{D}} \left[ Q_{\omega_i}(s_t, a_t) - (r_t + \gamma Q_{\omega'_i}(s_{t+1}, \pi_\theta(s_{t+1})) - \alpha \log(\mu_\theta(a_{t+1} | s_{t+1}))) \right]^2.$$

15:   Perform dual update on  $\nu$

$$\nu_{k+1}^j = \nu_k^j + \eta_\nu \mathbb{E}_{s \sim \pi} [\max\{0, g_j(\tilde{\pi}(s_t); s_t)\}] \quad \forall j.$$

16:   Soft update target networks:

$$\omega'_i \leftarrow \tau \omega_i + (1 - \tau) \omega'_i.$$

17:   **end for**

18: **end for**

---

519 **Action.** The action space  $|A| \in \mathbb{R}^2$  of Safe CartPole is the sign and magnitude of two forces  $f_1, f_2$   
520 from different directions. Specifically, one force is inclined 30 degrees below the  $x$  axis, and the  
521 other is inclined 60 degrees above the  $x$  axis.

522 **Reward.** The goal of Safe CartPole is similar to the CartPole in Gym [10], which requires the pole  
523 to keep upright as long as possible. Therefore, we employ the same reward policy that returns 1 if the  
524 pole keeps upright. Otherwise, this episode will end since the pole falls.

525 **Equality Constraints.** The equality constraint of Safe CartPole is that the summation of two forces  
526 in  $y$  axis should be zero. That is, we desire to avoid extra friction on the cart, i.e.,

$$f_y := f_1 \sin \theta_1 + f_2 \sin \theta_2 = 0. \quad (21)$$

527 **Inequality Constraints.** The inequality constraint is that the summation of two forces in the  $x$  axis  
528 should be bounded by a box constraint, which indicates the physical limitation of the magnitude of  
529 the summation force in the  $x$  axis.

$$\underline{f}_x \leq f_x := f_1 \cos \theta_1 + f_2 \cos \theta_2 \leq \overline{f}_x. \quad (22)$$

Furthermore, according to [17], we derive the dynamics of Safe CartPole when there exists a force in the vertical direction as shown in (23). Notably, we can always derive the position or angle, velocity or angular velocity in the next step, using the semi-implicit Euler method.

$$\begin{aligned}
N_c &= f_y + (m_c + m_p)g - m_pl \left( \ddot{\theta} \sin \theta + \dot{\theta}^2 \cos \theta \right), \\
\ddot{\theta} &= \frac{g \sin \theta - \frac{\mu_p \dot{\theta}}{m_pl}}{l \left\{ \frac{4}{3} - \frac{m_p \cos \theta}{m_c + m_p} [\cos \theta - \mu_c \operatorname{sgn}(N_c \dot{x})] \right\}} + \\
&\quad \frac{\cos \theta \left\{ \frac{-f_x - m_pl \dot{\theta}^2 [\sin \theta + \mu_c \operatorname{sgn}(N_c \dot{x}) \cos \theta]}{m_c + m_p} + \mu_c g \operatorname{sgn}(N_c \dot{x}) \right\}}{l \left\{ \frac{4}{3} - \frac{m_p \cos \theta}{m_c + m_p} [\cos \theta - \mu_c \operatorname{sgn}(N_c \dot{x})] \right\}}, \\
\ddot{x} &= \frac{f_x + m_pl \left( \dot{\theta}^2 \sin \theta - \ddot{\theta} \cos \theta \right) - \mu_c N_c \operatorname{sgn}(N_c \dot{x})}{m_c + m_p},
\end{aligned} \tag{23}$$

where  $N_c$  is the pressure on the cart,  $m_c, m_p$  are the mass of the cart and pole,  $l$  is the length of the pole,  $x, \theta$  are the position of the cart and the angle of the pole respectively, and  $\mu_c$  is the dynamic friction coefficient of the cart.

## D.2 Spring Pendulum

Motivated by the Pendulum environment [10], Spring Pendulum environment replaces the pendulum with a light spring, which connects the fixed point and the ball in the end of the spring.

**State.** The state space  $|S| \in \mathbb{R}^5$  of Spring Pendulum contains the cosine and sine of the angle, angular velocity, length of the spring, and the change rate in length.

**Action.** The action space  $|A| \in \mathbb{R}^2$  of Spring Pendulum is the sign and magnitude of two forces  $f_x, f_y$  in the  $x, y$  axes. Notably, since the spring pendulum is rotating, the angle between the  $x$  or  $y$  axis and the spring is changing as well. Thus, this environment is more difficult than Safe CartPole in some sense.

**Reward.** The goal of Spring Pendulum is to keep the spring pendulum in an upright position. The episode will never be done until the maximum time step. Specifically, the reward function is  $\frac{1}{1+100|\theta|}$ , where  $\theta$  is the angle between the spring pendulum and the  $y$  axis. That means the agent will achieve a reward of nearly 1 when the spring pendulum is close enough to the upright position. Otherwise, a reward of almost 0 will be returned to the agent.

**Equality Constraints.** The equality constraint of the Spring Pendulum is to limit the change rate of length to zero since the spring pendulum is expected to perform like a normal pendulum without changing the length of the pendulum.

$$\dot{l}_t = \dot{l}_{t-1} + \ddot{l}_t dt = 0. \tag{24}$$

Notably, when  $\dot{l}_{t-1} = 0$ , the equality constraint will be  $\ddot{l} = 0$ .

**Inequality Constraints.** The inequality constraint is the magnitude constraint on the summation of these two forces.

$$f_x^2 + f_y^2 \leq \bar{f}^2. \tag{25}$$

Furthermore, to connect each component mentioned above, we derive the dynamics of the Spring Pendulum. Applying Euler-Lagrange Equation  $\mathcal{L} = T - V$  to spring pendulum, then we obtain

$$\begin{aligned}
V &= mgy + \frac{1}{2}k(l - l_0)^2 \\
&= mgl \cos \theta + \frac{1}{2}k(l - l_0)^2, \\
T &= \frac{1}{2}mv^2 = \frac{1}{2}m(\dot{x}^2 + \dot{y}^2) \\
&= \frac{1}{2}m(\dot{l}^2 + l^2\dot{\theta}^2).
\end{aligned} \tag{26}$$

558 Applying the Euler-Lagrange equations for  $\theta$  and  $l$ , we have

$$\begin{aligned}\frac{d}{dt} \frac{\partial \mathcal{L}}{\partial \dot{\theta}} &= 2ml\dot{\theta} + ml\ddot{\theta}, \\ \frac{\partial \mathcal{L}}{\partial \theta} &= -mg \sin \theta, \\ \frac{d}{dt} \frac{\partial \mathcal{L}}{\partial \dot{l}} &= m\ddot{l} - ml\dot{\theta}^2 + k(l - l_0), \\ \frac{\partial \mathcal{L}}{\partial l} &= -mg \cos \theta.\end{aligned}\tag{27}$$

559 Finally, we will obtain the dynamics of the spring pendulum

$$\begin{aligned}\ddot{\theta} &= \frac{f_r - 2ml\dot{\theta} - mg \sin \theta}{ml}, \\ \ddot{l} &= \frac{f_s + ml\dot{\theta}^2 - k(l - l_0) - mg \cos \theta}{m},\end{aligned}\tag{28}$$

560 where  $f_r = -f_y \sin \theta + f_x \cos \theta$  and  $f_s = f_y \cos \theta + f_x \sin \theta$  are the force perpendicular to and  
561 along the spring pendulum.

### 562 D.3 Optimal Power Flow with Battery Energy Storage

563 In smart grid operation controlling, Optimal Power Flow (OPF) is defined as

$$\begin{aligned}\min_{p_g, q_g, v} \quad & p_g^T A p_g + b^T p_g \\ \text{subject to} \quad & \underline{p}_g \leq p_g \leq \bar{p}_g, \\ & \underline{q}_g \leq q_g \leq \bar{q}_g, \\ & \underline{v} \leq |v| \leq \bar{v}, \\ & (p_g - p_d) + (q_g - q_d) i = \text{diag}(v) Y v,\end{aligned}\tag{29}$$

564 where  $p_g, q_g \in \mathbb{R}^n$  are the active and reactive power generation of the buses, and  $v \in \mathbb{C}^n$  are the  
565 voltage of the buses in the grid.  $Y \in \mathbb{C}^{n \times n}$  denotes the admittance matrix.  $p_d, q_d \in \mathbb{R}^n$  are active  
566 and reactive power demand of all buses. Notably, some buses in the electricity grid are not generator  
567 buses, and  $p_g, q_g$  of these buses will be zero. Therefore, the actual dimension of  $p_g, q_g$  to determine  
568 is the number of generator buses  $n^g$ . Based on the OPF problem, OPF with Battery Energy Storage is  
569 defined as

$$\begin{aligned}\min_{p_g, q_g, v, p_b} \quad & \sum_{t=0}^T p_g^T(t) A p_g(t) + b^T p_g(t) + c^T(t) p_b(t) \\ \text{subject to} \quad & (p_g(t) - p_d(t) - p_b(t)) + (q_g(t) - q_d(t)) i = \text{diag}(v(t)) Y v(t), \\ & \underline{p}_g \leq p_g(t) \leq \bar{p}_g, \\ & \underline{q}_g \leq q_g(t) \leq \bar{q}_g, \\ & \underline{v} \leq |v(t)| \leq \bar{v}, \\ & \underline{p}_b(t) \leq p_b(t) \leq \bar{p}_b(t).\end{aligned}\tag{30}$$

570 The additional variables  $p_b \in \mathbb{R}^n$  is the charging (positive) or discharging (negative) power of the  
571 battery groups, and  $c(t)$  represents the cost or the income in the time step  $t$ . Exactly, we only connect  
572 the batteries with the generator buses. Therefore, the actual number of  $p_b$  to determine is  $n^g$  in this  
573 benchmark as well.

574 Specifically, this benchmark is based on a 14-node power system, which is available in **PYPOWER**  
575 package. We adopt the same topology of the electricity grid with 5 generator nodes in this benchmark.  
576 The data on power demand and day-ahead electricity prices are from [1, 2]. We refer to the  
577 distribution of the real-world data in one day, which is shown in Figure 4, and normalize the  
578 magnitude of the concrete data to incorporate them into the 14-node power system.  
579

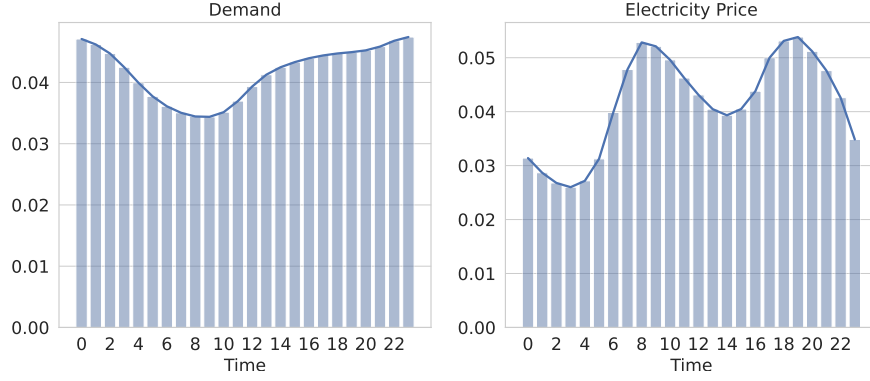

Figure 4: Distribution of power demand (left) and electricity price (right) in 24 hours.

**State.** The state space  $|S| \in \mathbb{R}^{57}$  of OPF with Battery Energy Storage contains active and reactive power demand of 14 buses, the state of 5 batteries connected to 5 generator nodes, and the 24-hour day-ahead electricity price.

**Action.** The action space  $|A| \in \mathbb{R}^{43}$  of OPF with Battery Energy Storage involves the active and reactive power generation of 5 generator buses, voltage magnitude and angle of 14 buses, and the power generation or demand of 5 batteries.

**Reward.** The goal of OPF with Battery Energy Storage is to minimize the total cost. Therefore, we regard the negative cost in the current time step  $-p_g^T(t)Ap_g(t) - b^Tp_g(t) + c^T(t)p_b(t)$  as the reward. Actually, there exist efficiency parameters  $\eta_{ch}, \eta_{dis}$  in the procedure of charging and discharging. Moreover, each part of the cost may have a different magnitude, which needs us to consider a tradeoff between different parts. For convenience, we model all of these factors into  $c(t)$ .

**Equality Constraints.** The equality constraints of OPF with Battery Energy Storage are the equations of power flow, i.e.,

$$(p_g(t) - p_d(t) - p_b(t)) + (q_g(t) - q_d(t))i = \text{diag}(v(t))Yv(t). \quad (31)$$

**Inequality Constraints.** The inequality constraint is the box constraint on the decision variables.

$$\begin{aligned} \underline{p}_g &\leq p_g(t) \leq \bar{p}_g, \\ \underline{q}_g &\leq q_g(t) \leq \bar{q}_g, \\ \underline{v} &\leq |v(t)| \leq \bar{v}, \\ \underline{p}_b(t) &\leq p_b(t) \leq \bar{p}_b(t). \end{aligned} \quad (32)$$

The dynamics of OPF with Battery Energy Storage are much simpler than the former two benchmarks, since the active and reactive power demand  $p_d, q_d$  in each time step, is irrelevant to the last state and action. Thus, we only need to care about the change in the electrical power of batteries, i.e.,  $\text{soc}(t) = \text{soc}(t-1) + [\eta_{ch}p_{ch}(t) + p_{dis}(t)/\eta_{dis}]$ , where  $p_{ch}(t) = \max\{0, p_b(t)\}$ ,  $p_{dis}(t) = \min\{0, p_b(t)\}$ .

## E Additional Experiments

To further discuss the efficiency of RPO, we do some extra experiments in our hardest benchmark, OPF with Battery Energy Storage. The results and related analysis are presented below.

### E.1 Sensitivity Analysis

The projection stage performs the GRG updates until all inequality constraints are satisfied. It is valuable to investigate the impact of the number of maximum GRG updates  $K$  on model performance. Here, we conduct experiments under different  $K$  values in OPF with the Battery Energy Storage task. As shown in Figure 5, we compare the performance of RPOSAC under  $K = 0, 10, 50, 200$  in the projection stage. The result indicates that the choice of  $K$  does not have an obvious impact on the episodic reward when  $K$  is not too large. The slight improvement in constraint violation between  $K = 10$  and  $K = 50$  illustrates that  $K = 10$  is actually the most appropriate since it needs much less computation compared with  $K = 50$  during the projection stage. Besides, the case of  $K = 200$  shows that too large modifications on actions during the training process will lead to poor performance in some situations. The principal reason we believe is that the value network cannot back-propagate an accurate gradient to the policy network when  $K$  is too large. Concretely, a large  $K$  leads to the samples being too far from the policy  $\tilde{\pi}_\theta$ , which further results in the inaccurate estimation of the policy  $\tilde{\pi}_\theta$  in the value network. Notably, a practical trick is to set a small  $K$  during the training period and a large  $K$  during the evaluation period.

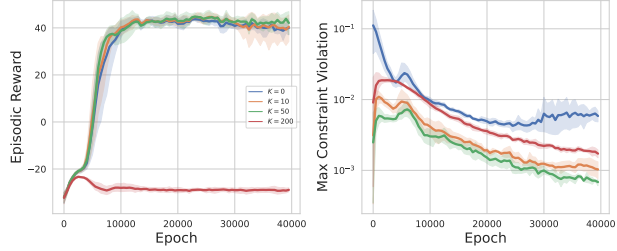

Figure 5: Comparison on RPO under different  $K$ .

### E.2 Adaptive v.s. Fixed Penalty Factor

Besides, We conduct experiments to confirm the performance of the adaptive penalty factor with dual update compared to that of the fixed penalty factor as introduced in Section 4. For fairness, we check the converged values of the adaptive penalty factor with learning rate  $\eta = 0.02$  in RPOSAC, and we find that the converged penalty factors are ranging around 100. Therefore, we chose  $\nu^j = 100$  for all penalty terms in the setting of RPOSAC with the fixed penalty factor. Results in Figure 6 show the advantage of the adaptive penalty factors in terms of episodic reward.

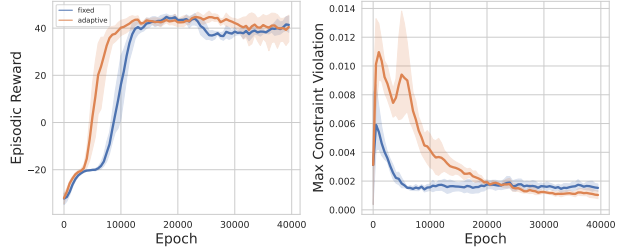

Figure 6: Comparison between RPO with fixed penalty factor and adaptive penalty factor

### E.3 Necessity of Backpropagation with Generalized Reduced Gradient

As we illustrate in the construction stage, the integrated actions are actually determined once the basic actions are given. Therefore, it is possible for the value network to approximate the mapping from the basic actions to the nonbasic actions. This seems that there is no need for the backpropagation with generalized reduced gradient which requires extra gradient flow from nonbasic actions if only the hard equality constraints need to be addressed or the hard inequality constraints are only related to the basic actions.

651 To explore the necessity of the back-  
652 propagation with generalized re-  
653 duced gradient, we also contrast the  
654 performance in RPOSAC trained  
655 with/without the complete gradient.  
656 Concretely, for RPOSAC trained  
657 without the complete gradient, we  
658 only input the basic actions into  
659 the value networks and expect it  
660 can approximate the complete gradi-  
661 ent, which is known as generalized  
662 reduced gradient. The results are  
663 shown in Figure 7. It reflects that  
664 the value network cannot backpropagate an accurate gradient directly, and indicates the necessity to  
665 explicitly construct the gradient flow from nonbasic actions to basic actions.

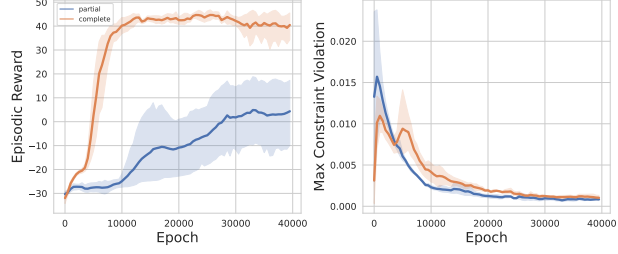

Figure 7: Comparison between RPO with partial gradient and complete gradient.

## 666 F Hyper-parameters

667 We implemented our experiments on a GPU of NVIDIA GeForce RTX 3090 with 24GB. Each exper-  
668 iment on Safe CartPole and Spring Pendulum takes about 0.5 hours. Each experiment on OPF with  
669 Battery Energy Storage takes about 4 hours. Moreover, we adopt similar neural network architectures  
670 for policy and value networks except for the input and output dimensions in all experiments. The  
671 policy and value networks both have two hidden layers with 256 hidden units and only differ in input  
672 and output layers. Besides, we also show the detailed hyper-parameters used in our experiments.  
673 Table 3, Table 4 and Table 5 respectively present the parameters used in Safe CartPole, Spring  
674 Pendulum, and OPF with Battery Energy Storage. Additionally, the implementation of three safe RL  
675 algorithms in our experiments are based on omnisafe<sup>1</sup> and safe-explorer<sup>2</sup>, and recommended values  
676 are adopted for hyper-parameters not mentioned in the following tables.

| Parameter                                | CPO  | CUP  | Safety Layer | DDPG-L | SAC-L | RPODDPG | RPOSAC |
|------------------------------------------|------|------|--------------|--------|-------|---------|--------|
| Batch Size $\mathcal{B}$                 | 256  | 256  | 256          | 256    | 256   | 256     | 256    |
| Discount Factor $\gamma$                 | 0.95 | 0.95 | 0.95         | 0.95   | 0.95  | 0.95    | 0.95   |
| Target Smoothing Coefficient $\tau$      | N/A  | N/A  | 0.005        | 0.005  | 0.005 | 0.005   | 0.005  |
| Frequency of Policy Update               | N/A  | N/A  | N/A          | 0.25   | 0.25  | 0.25    | 0.25   |
| Total Epochs $T$                         | 2E4  | 2E4  | 2E4          | 2E4    | 2E4   | 2E4     | 2E4    |
| Capacity of Replay Buffer $\mathcal{D}$  | N/A  | N/A  | 2E4          | 2E4    | 2E4   | 2E4     | 2E4    |
| Random Noise in Exploration $\epsilon$   | N/A  | N/A  | 1E-2         | 1.0    | N/A   | 1.0     | N/A    |
| LR for Policy Network $\mu$              | 1E-4 | 1E-4 | 1E-4         | 1E-4   | 1E-4  | 1E-4    | 1E-4   |
| LR for Value Network $Q$                 | 3E-4 | 3E-4 | 3E-4         | 3E-4   | 3E-4  | 3E-4    | 3E-4   |
| LR for Penalty Factor $\nu$              | N/A  | N/A  | N/A          | 0.2    | 0.2   | 0.2     | 0.2    |
| Temperature $\alpha$                     | N/A  | N/A  | N/A          | N/A    | 0.1   | N/A     | 0.1    |
| Projection Step $\eta_a$                 | N/A  | N/A  | N/A          | N/A    | N/A   | 2E-2    | 2E-2   |
| Max GRG Updates $K$                      | N/A  | N/A  | N/A          | N/A    | N/A   | 10      | 10     |
| Projection Step in Evaluation $\eta_a^e$ | N/A  | N/A  | N/A          | N/A    | N/A   | 2E-2    | 2E-2   |
| Max GRG Updates in Evaluation $K^e$      | N/A  | N/A  | N/A          | N/A    | N/A   | 50      | 50     |

Table 3: Hyper-parameters for experiments in Safe CartPole.

<sup>1</sup><https://github.com/PKU-Alignment/omnisafe>

<sup>2</sup><https://github.com/AgrawalAmey/safe-explorer>

| Parameter                                | CPO  | CUP  | Safety Layer | DDPG-L | SAC-L | RPODDPG | RPOSAC |
|------------------------------------------|------|------|--------------|--------|-------|---------|--------|
| Batch Size $\mathcal{B}$                 | 256  | 256  | 256          | 256    | 256   | 256     | 256    |
| Discount Factor $\gamma$                 | 0.95 | 0.95 | 0.95         | 0.95   | 0.95  | 0.95    | 0.95   |
| Target Smoothing Coefficient $\tau$      | N/A  | N/A  | 0.005        | 0.005  | 0.005 | 0.005   | 0.005  |
| Frequency of Policy Update               | N/A  | N/A  | N/A          | 0.25   | 0.25  | 0.25    | 0.25   |
| Total Epochs $T$                         | 2E4  | 2E4  | 2E4          | 2E4    | 2E4   | 2E4     | 2E4    |
| Capacity of Replay Buffer $\mathcal{D}$  | N/A  | N/A  | 2E4          | 2E4    | 2E4   | 2E4     | 2E4    |
| Random Noise in Exploration $\epsilon$   | N/A  | N/A  | 1E-2         | 0.5    | N/A   | 0.5     | N/A    |
| LR for Policy Network $\mu$              | 1E-4 | 1E-4 | 1E-4         | 1E-4   | 1E-4  | 1E-4    | 1E-4   |
| LR for Value Network $Q$                 | 3E-4 | 3E-4 | 3E-4         | 3E-4   | 3E-4  | 3E-4    | 3E-4   |
| LR for Penalty Factor $\nu$              | N/A  | N/A  | N/A          | 0.01   | 0.01  | 0.01    | 0.01   |
| Temperature $\alpha$                     | N/A  | N/A  | N/A          | N/A    | 0.01  | N/A     | 0.01   |
| Projection Step $\eta_a$                 | N/A  | N/A  | N/A          | N/A    | N/A   | 2E-3    | 2E-3   |
| Max GRG Updates $K$                      | N/A  | N/A  | N/A          | N/A    | N/A   | 10      | 10     |
| Projection Step in Evaluation $\eta_a^e$ | N/A  | N/A  | N/A          | N/A    | N/A   | 2E-3    | 2E-3   |
| Max GRG Updates in Evaluation $K^e$      | N/A  | N/A  | N/A          | N/A    | N/A   | 50      | 50     |

Table 4: Hyper-parameters for experiments in Spring Pendulum.

| Parameter                                | CPO  | CUP  | Safety Layer | DDPG-L | SAC-L | RPODDPG | RPOSAC |
|------------------------------------------|------|------|--------------|--------|-------|---------|--------|
| Batch Size $\mathcal{B}$                 | 256  | 256  | 256          | 256    | 256   | 256     | 256    |
| Discount Factor $\gamma$                 | 0.95 | 0.95 | 0.95         | 0.95   | 0.95  | 0.95    | 0.95   |
| Target Smoothing Coefficient $\tau$      | N/A  | N/A  | 0.005        | 0.005  | 0.005 | 0.005   | 0.005  |
| Frequency of Policy Update               | N/A  | N/A  | N/A          | 0.25   | 0.25  | 0.25    | 0.25   |
| Total Epochs $T$                         | 4E4  | 4E4  | 4E4          | 4E4    | 4E4   | 4E4     | 4E4    |
| Capacity of Replay Buffer $\mathcal{D}$  | N/A  | N/A  | 2E4          | 2E4    | 2E4   | 2E4     | 2E4    |
| Random Noise in Exploration $\epsilon$   | N/A  | N/A  | 1E-2         | 1E-4   | N/A   | 1E-4    | N/A    |
| LR for Policy Network $\mu$              | 1E-4 | 1E-4 | 1E-4         | 1E-4   | 1E-4  | 1E-4    | 1E-4   |
| LR for Value Network $Q$                 | 3E-4 | 3E-4 | 3E-4         | 3E-4   | 3E-4  | 3E-4    | 3E-4   |
| LR for Penalty Factor $\nu$              | N/A  | N/A  | N/A          | 0.02   | 0.02  | 0.02    | 0.02   |
| Temperature $\alpha$                     | N/A  | N/A  | N/A          | N/A    | 0.001 | N/A     | 0.001  |
| Projection Step $\eta_a$                 | N/A  | N/A  | N/A          | N/A    | N/A   | 1E-4    | 1E-4   |
| Max GRG Updates $K$                      | N/A  | N/A  | N/A          | N/A    | N/A   | 10      | 10     |
| Projection Step in Evaluation $\eta_a^e$ | N/A  | N/A  | N/A          | N/A    | N/A   | 1E-4    | 1E-4   |
| Max GRG Updates in Evaluation $K^e$      | N/A  | N/A  | N/A          | N/A    | N/A   | 50      | 50     |

Table 5: Hyper-parameters for experiments in OPF with Battery Energy Storage.
